# Supplementary material for: Confirming the Bidirectional Nature of the Association Between Severe Hypoglycemic and Cardiovascular Events in Type 2 Diabetes: Insights From EXSCEL
Source: Oxford University Press journal article supplement (doi:10.2337/dc19-1079), 2019-12-28
Supplement: dc191079supplementarydata.pdf [file dc191079supplementarydata.pdf]

SUPPLEMENTARY DATA

**Supplementary Table 1. Baseline Characteristics of Participants According to Cardiovascular and Severe Hypoglycemic Events**

|                                      | <b>SHE and CV event (N=116)</b> | <b>SHE and no CV event (N=350)</b> |
|--------------------------------------|---------------------------------|------------------------------------|
| Age at Randomization (years)         | 65 (61, 71)                     | 63 (56, 70)                        |
| Female sex                           | 31 (26.7%)                      | 150 (42.9%)                        |
| Race                                 |                                 |                                    |
| White                                | 83 (71.6%)                      | 227 (64.9%)                        |
| Black                                | 11 (9.5%)                       | 35 (10.0%)                         |
| Asian                                | 10 (8.6%)                       | 40 (11.4%)                         |
| Other                                | 12 (10.3%)                      | 48 (13.7%)                         |
| Duration of type 2 diabetes (years)  | 16 (11, 23)                     | 14 (9, 21)                         |
| History of CV disease                |                                 |                                    |
| Coronary artery disease              | 91 (78.4%)                      | 198 (56.6%)                        |
| Cerebrovascular disease              | 34 (29.3%)                      | 56 (16.0%)                         |
| Peripheral artery disease            | 25 (21.6%)                      | 63 (18.0%)                         |
| CV event                             |                                 |                                    |
| Prior CV event                       | 107 (92.2%)                     | 254 (72.6%)                        |
| CV disease without prior event       | 0 (0%)                          | 6 (1.7%)                           |
| Neither prior CV event nor disease   | 9 (7.8%)                        | 90 (25.7%)                         |
| Heart failure                        | 43 (37.1%)                      | 55 (15.7%)                         |
| Charlson Comorbidity Index           | 8 (6, 9)                        | 6 (4, 7)                           |
| Systolic blood pressure (mmHg)       | 132 (122, 145)                  | 136 (125, 148)                     |
| Diastolic blood pressure (mmHg)      | 77 (68, 81)                     | 78 (70, 83)                        |
| Heart rate (bpm)                     | 73 (65, 82)                     | 72 (65, 80)                        |
| Body mass index (kg/m <sup>2</sup> ) | 32.9 (28.9, 37.5)               | 31.2 (27.4, 35.6)                  |
| HbA1c (%)                            | 8.2 (7.5, 9.2)                  | 8.1 (7.5, 8.8)                     |
| Total cholesterol (mg/dL)            | 151 (131, 183)                  | 166 (139, 199)                     |
| LDL (mg/dL)                          | 79 (61, 104)                    | 90 (67, 120)                       |
| HDL (mg/dL)                          | 38 (32, 47)                     | 42 (35, 50)                        |
| Triglycerides (mg/dL)                | 167 (104, 230)                  | 161 (106, 222)                     |
| eGFR (mL/min/1.73m <sup>2</sup> )    | 62 (52, 84)                     | 72 (58, 87)                        |
| eGFR (mL/min/1.73m <sup>2</sup> )    |                                 |                                    |
| ≥90                                  | 20 (17.2%)                      | 76 (21.8%)                         |
| 60-89                                | 46 (39.7%)                      | 173 (49.6%)                        |
| 30-59                                | 50 (43.1%)                      | 100 (28.7%)                        |
| CV medications                       |                                 |                                    |
| Aspirin                              | 96 (82.8%)                      | 229 (65.4%)                        |
| Thienopyridines                      | 40 (34.5%)                      | 58 (16.6%)                         |

SUPPLEMENTARY DATA

|                                  | SHE and CV event (N=116) | SHE and no CV event (N=350) |
|----------------------------------|--------------------------|-----------------------------|
| Any anti-platelets               | 105 (90.5%)              | 258 (73.7%)                 |
| ACEI or ARB                      | 90 (77.6%)               | 284 (81.1%)                 |
| Beta blockers                    | 85 (73.3%)               | 193 (55.1%)                 |
| Calcium channel blockers         | 42 (36.2%)               | 118 (33.7%)                 |
| Any anti-hypertensive            | 114 (98.3%)              | 315 (90.0%)                 |
| Statin                           | 100 (86.2%)              | 266 (76.0%)                 |
| Any lipid lowering medication    | 101 (87.1%)              | 277 (79.1%)                 |
| Diuretics                        | 80 (69.0%)               | 155 (44.3%)                 |
| Diabetes medications             |                          |                             |
| Biguanide                        | 68 (58.6%)               | 245 (70.0%)                 |
| Sulfonylurea                     | 25 (21.6%)               | 123 (35.1%)                 |
| Insulin                          | 92 (79.3%)               | 235 (67.1%)                 |
| Dose in units per kg body weight | 0.82 (0.51, 1.15)        | 0.70 (0.40, 1.03)           |
| DPP-4i                           | 7 (6.0%)                 | 48 (13.7%)                  |
| TZD                              | 4 (3.4%)                 | 10 (2.9%)                   |
| Other                            | 3 (2.6%)                 | 11 (3.1%)                   |
| Insulin, sulfonylurea, or NSS    | 111 (95.7%)              | 324 (92.6%)                 |

Data presented as number and percentage or median (25th, 75th percentile).

ACEI, angiotensin-converting enzyme inhibitor; ARB, angiotensin receptor blocker; CV, cardiovascular; DPP-4i, dipeptidyl peptidase-4 inhibitor; eGFR, estimated glomerular filtration rate; HbA<sub>1c</sub>, glycated hemoglobin; HDL, high-density lipoprotein; LDL, low-density lipoprotein; NSS, non-sulfonylurea secretagogues; SHE, severe hypoglycemic event; TZD, thiazolidinedione.

SUPPLEMENTARY DATA

**Supplementary Figure 1. Time-Dependent Hazard Ratio Plots With 95% Confidence Intervals and Numbers at Risk for A) MACE and B) Cardiovascular Death**

**A.**

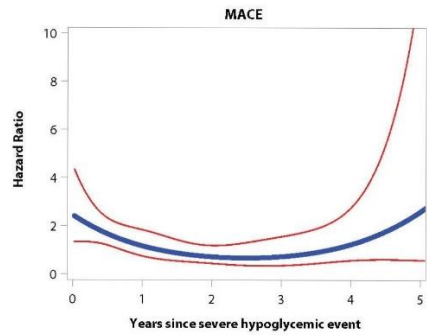

P=0.0312

| Year following SHE | Number at risk | Events in last 6 months |
|--------------------|----------------|-------------------------|
| 0.0                | 417            | -                       |
| 0.5                | 343            | 22                      |
| 1.0                | 292            | 8                       |
| 1.5                | 248            | 5                       |
| 2.0                | 195            | 7                       |
| 2.5                | 157            | 2                       |
| 3.0                | 114            | 1                       |
| 3.5                | 83             | 0                       |
| 4.0                | 45             | 2                       |
| 4.5                | 24             | 3                       |
| 5.0                | 8              | 0                       |
| 5.5                | 4              | 0                       |

**B.**

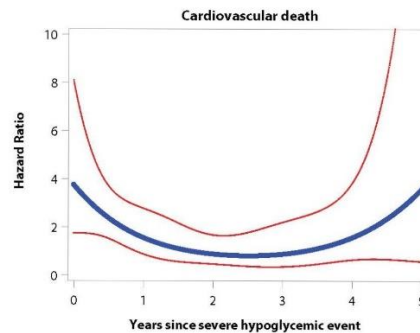

P=0.0563

| Year following SHE | Number at risk | Events in last 6 months |
|--------------------|----------------|-------------------------|
| 0.0                | 452            | -                       |
| 0.5                | 381            | 12                      |
| 1.0                | 335            | 3                       |
| 1.5                | 287            | 6                       |
| 2.0                | 235            | 3                       |
| 2.5                | 192            | 1                       |
| 3.0                | 141            | 2                       |
| 3.5                | 106            | 0                       |
| 4.0                | 61             | 3                       |
| 4.5                | 35             | 2                       |
| 5.0                | 13             | 0                       |
| 5.5                | 7              | 0                       |
